## In-hospital prognosis of patients with primary and secondary acute heart failure diagnosis

E. Apostolou, P. Rafouli-Stergiou, S. Liori, V. Bistola, E. Polyzogopoulou, G. Doumanis, N. Cholevas, A. Frogoudaki, I. Ikonomidis, J. Parissis

Attikon University Hospital - 2nd Department of Cardiology - Heart Failure Unit, Athens, Greece

**Funding Acknowledgement:** Type of funding source: None

**Introduction:** Secondary acute heart failure (AHF) during hospitalization for another primary diagnosis is a frequent in-hospital complication.

**Purpose:** This analysis aims to describe differences in prognosis of these patients in comparison with patients admitted for AHF (primary AHF diagnosis) and also identify factors associated with in-hospital mortality.

**Methods:** This is a sub-analysis of the Acute Heart Failure Global Survey of Standard Treatment (ALARM-HF), which enrolled 4953 patients from 9 countries. All parameters univariately associated with in-hospital mortality in the primary and secondary AHF groups were included in the multivariate logistic regression model.

**Results:** Secondary AHF diagnosis was observed in 24.1% (N=1196) of the total study cohort. These patients demonstrated almost double all-cause in-hospital mortality rates compared to patients with primary AHF (16.9% versus 8.9%,  $p<0.001$ ).

In patients with primary AHF, negative prognostic factors included older age ( $>75$  years) (OR 2.01, 95% CI 1.24–3.26,  $p=0.004$ ), acute coronary syndromes (ACS) (OR 2.71, 95% CI 1.57–4.69,  $p<0.001$ ), chronic renal disease (OR 2.02, 95% CI 1.13–3.61,  $p=0.017$ ), presence of cold extremities (OR 2.04, 95% CI 1.23–3.40,  $p=0.006$ ), in-hospital treatment with CPAP (OR 2.55, 95% CI 1.20–5.41,  $p=0.014$ ), dobutamine (OR 2.55, 95% CI 1.52–4.28,  $p<0.001$ ), dopamine (OR 3.03, 95% CI 1.74–5.27,  $p<0.001$ ) and noradrenaline (OR 4.76, 95% CI 2.32–9.76,  $p<0.001$ ). Favorable pre-

dictors were systolic blood pressure  $\geq 100$  mmHg on admission (OR 0.54, 95% CI 0.31–0.94,  $p=0.031$ ), in-hospital treatment with ACEIs (OR 0.07, 95% CI 0.03–0.16,  $p<0.001$ ), ARBs (OR 0.30, 95% CI 0.13–0.70,  $p=0.005$ ) and vitamin-K antagonists (OR 0.06, 95% CI 0.007–0.44,  $p=0.006$ ).

In secondary AHF, independent predictors of in-hospital mortality included left ventricular ejection fraction (LVEF)  $<40\%$  (OR 2.36, 95% CI 1.17–4.75,  $p=0.016$ ), age  $>75$  years (OR 2.23, 95% CI 1.09–4.54,  $p=0.026$ ), ACS (OR 3.55, 95% CI 1.50–8.39,  $p=0.004$ ), diabetes (OR 2.26, 95% CI 1.23–4.16,  $p=0.008$ ), pre-admission treatment with digoxin (OR 7.27, 95% CI 1.83–28.87,  $p=0.005$ ), in-hospital medication with dobutamine (OR 2.43, 95% CI 1.28–4.61,  $p=0.006$ ), dopamine (OR 2.29, 95% CI 1.12–4.67,  $p=0.022$ ) and noradrenaline (OR 4.14, 95% CI 1.76–9.76,  $p=0.001$ ). Co-variables independently associated with survival benefit in secondary AHF were pre-admission treatment with diuretics (OR 0.29, 95% CI 0.09–0.88,  $p=0.030$ ) and in-hospital treatment with ACEIs (OR 0.17, 95% CI 0.07–0.39,  $p<0.001$ ) and aspirin (OR 0.27, 95% CI 0.11–0.69,  $p=0.006$ ).

**Conclusion:** Patients with secondary AHF experienced a more complicated in-hospital course with worse prognosis, compared to primary AHF. LVEF  $<40\%$ , age  $>75$  years, ACS, diabetes, pre-admission treatment with digitalis, in-hospital medication with dobutamine, dopamine and noradrenaline were identified as independent negative prognostic factors of in-hospital mortality in secondary AHF patients.
